# Supplementary material
Source: PubMed Central journal article supplement (PMC7098841)
Supplement: NIHMS1049709-supplement-1.pdf [file NIHMS1049709-supplement-1.pdf]

**Supplemental Figure 1: Airway Provider for each of the First 4 Intubation Attempts A) NICU B) DR**

**A) NICU**

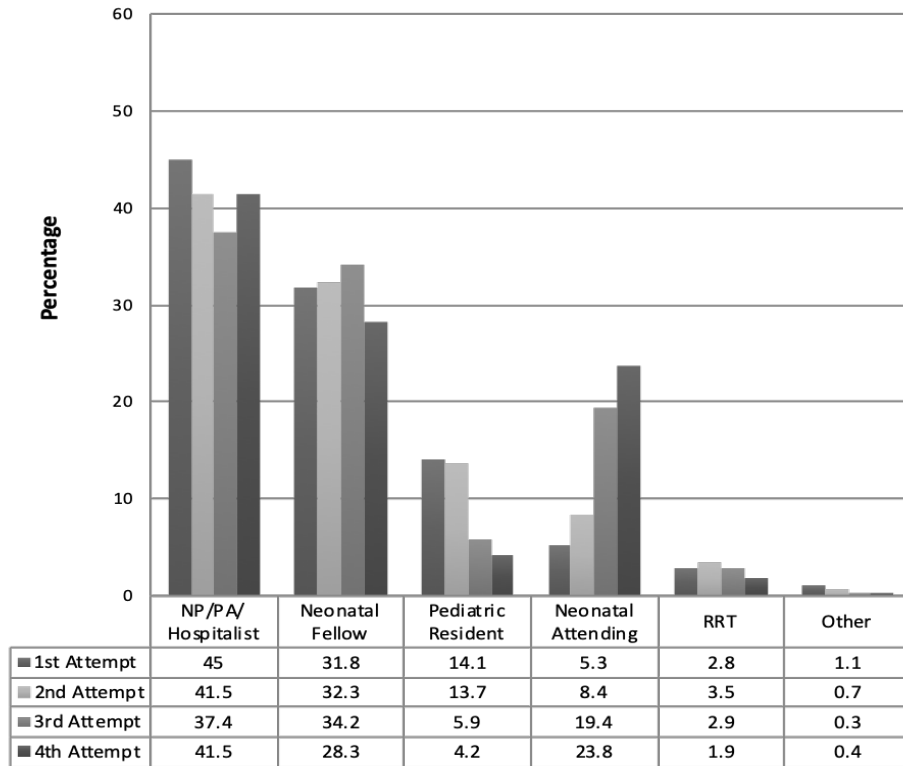

**B) DR**

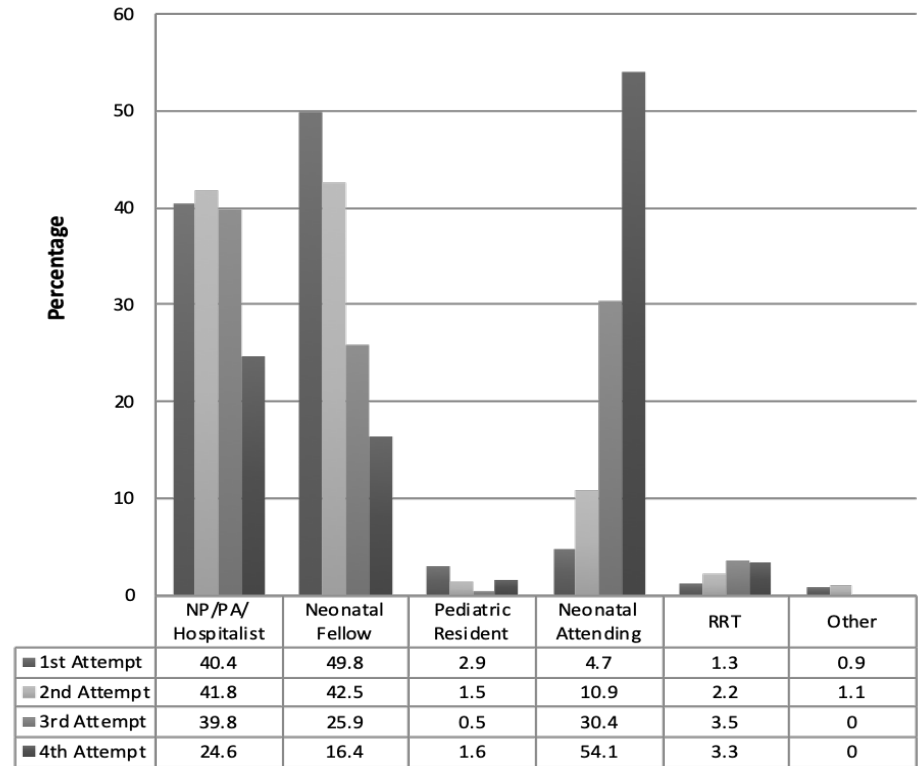

NP= Nurse Practitioner, PA= Physician's Assistant, RRT= Registered Respiratory Therapist

**Supplemental Table 1: Univariable Analysis of Type of Adverse TIAE,\* by Setting**

| Type of Adverse TIAE**                                                            | NICU<br>n=2279 | Delivery Room<br>n=866 | p-value |
|-----------------------------------------------------------------------------------|----------------|------------------------|---------|
| <b>Severe TIAE; n (%)</b>                                                         |                |                        |         |
| Delayed Recognition of Esophageal Intubation                                      | 28 (1.2%)      | 12 (1.4%)              | 0.73    |
| Chest Compressions <1 min                                                         | 19 (0.8%)      | 12 (1.4%)              | 0.16    |
| Laryngospasm                                                                      | 11 (0.5%)      | 1 (0.1%)               | 0.20    |
| Pneumothorax and/or Pneumomediastinum                                             | 10 (0.4%)      | 2 (0.2%)               | 0.53    |
| Cardiac Arrest, patient survived                                                  | 8 (0.4%)       | 3 (0.3%)               | 0.99    |
| Direct Airway Injury                                                              | 7 (0.3%)       | 2 (0.2%)               | 0.99    |
| Emesis with Aspiration                                                            | 8 (0.4%)       | 0 (0.0%)               | 0.12    |
| Cardiac Arrest, patient died                                                      | 3 (0.1%)       | 3 (0.3%)               | 0.36    |
| Hypotension Requiring Intervention                                                | 3 (0.1%)       | 1 (0.1%)               | 0.99    |
| Hypertension Requiring Intervention                                               | 1 (<0.1%)      | 0 (0.0%)               | 0.99    |
| <b>Non-Severe TIAE; n (%)</b>                                                     |                |                        |         |
| Immediate Recognition of Esophageal Intubation                                    | 208 (9.1%)     | 108 (12.5%)            | 0.01    |
| Dysrhythmia                                                                       | 132 (5.8%)     | 36 (4.2%)              | 0.07    |
| Mainstem Intubation                                                               | 38 (1.7%)      | 7 (0.8%)               | 0.07    |
| Gum or Dental Trauma                                                              | 33 (1.4%)      | 7 (0.8%)               | 0.15    |
| Emesis without Aspiration                                                         | 25 (1.1%)      | 0 (0.0%)               | <0.001  |
| Pain and/or agitation requiring additional medication causing delay in intubation | 11 (0.5%)      | 1 (0.1%)               | 0.20    |
| Lip Trauma                                                                        | 7 (0.3%)       | 3 (0.3%)               | 0.99    |
| Epistaxis                                                                         | 4 (0.2%)       | 1 (0.1%)               | 0.99    |

\*TIAE= tracheal intubation adverse event

\*\*More than one TIAE can be selected for a given encounter

**Supplemental Table 2:** Sensitivity Analysis of Intubation Outcomes of neonates excluding large quaternary referral center, by Setting\*

|                           | aOR (95% CI)         |         |
|---------------------------|----------------------|---------|
|                           | DR, compared to NICU | p-value |
| First Attempt Success     | 1.00 (0.78 to 1.28)  | 0.99    |
| Course Success            | 0.44 (0.26 to 0.74)  | 0.002   |
| Success within 4 attempts | 1.53 (1.03 to 2.26)  | 0.03    |
| Any TIAE                  | 0.80 (0.63 to 1.01)  | 0.06    |
| Severe TIAE               | 0.70 (0.47 to 1.02)  | 0.07    |
| Severe desaturation       | 0.74 (0.49 to 1.11)  | 0.15    |
| Bradycardia               | 0.41 (0.23 to 0.71)  | 0.002   |

aOR= adjusted odds ratio, CI= confidence interval

\* After adjustment for weight at intubation, approach, pre-medication, indication, provider, and center

**Supplemental Table 3: Sensitivity Analysis of Intubation Outcomes of neonates  $\leq 1$  day old, by Setting\***

| Outcome                   | aOR (95% CI)<br>DR, compared to NICU | p-value |
|---------------------------|--------------------------------------|---------|
| First Attempt Success     | 0.82 (0.65 to 1.04)                  | 0.10    |
| Course Success            | 0.70 (0.38 to 1.28)                  | 0.24    |
| Success within 4 attempts | 1.60 (1.12 to 2.30)                  | 0.01    |
| Any TIAE                  | 0.81 (0.60 to 1.08)                  | 0.14    |
| Severe TIAE               | 0.72 (0.46 to 1.11)                  | 0.14    |
| Severe desaturation       | 0.87 (0.51 to 1.46)                  | 0.59    |
| Bradycardia               | 0.63 (0.36 to 1.10)                  | 0.11    |

aOR= adjusted odds ratio, CI= confidence interval

\* After adjustment for weight at intubation, approach, pre-medication, indication, provider, and center
